# Supplementary material
Source: MDPI journal article supplement (https://www.mdpi.com/2073-445X/9/11/437)
Supplement: s1 [file s1]

## Supplementary Materials

**Table S1.** EMFF Projects in Galicia (2014–2020).

| FLAG                                                                                   | 1 Vigo – A<br>Guarda | 2<br>Pontevedra | 3<br>Arousa | 4 Costa<br>Sostible | 5 Costa da<br>Morte | 6 Southern<br>Artabro | 7 Northern<br>Artabro | 8 Mariña-<br>Ortegal |
|----------------------------------------------------------------------------------------|----------------------|-----------------|-------------|---------------------|---------------------|-----------------------|-----------------------|----------------------|
| Type of operation (one per project)                                                    |                      |                 |             |                     |                     |                       |                       |                      |
| Diversification                                                                        | 3                    | 9               | 27          | 11                  | 19                  | 7                     | 15                    | 22                   |
| Governance                                                                             | 1                    | 1               | 2           | 1                   | 0                   | 0                     | 3                     | 2                    |
| Environment                                                                            | 7                    | 6               | 3           | 0                   | 5                   | 7                     | 9                     | 7                    |
| Socio-cultural                                                                         | 2                    | 4               | 5           | 2                   | 3                   | 2                     | 7                     | 13                   |
| Added value                                                                            | 5                    | 19              | 26          | 9                   | 3                   | 12                    | 16                    | 40                   |
| Line of action (up to 5 per project)                                                   |                      |                 |             |                     |                     |                       |                       |                      |
| 1 Use of discards                                                                      | 1                    | 2               | 8           | 0                   | 0                   | 0                     | 0                     | 0                    |
| 2 Heritage                                                                             | 4                    | 10              | 5           | 2                   | 7                   | 2                     | 8                     | 20                   |
| 3 Campaigns                                                                            | 3                    | 1               | 3           | 1                   | 0                   | 2                     | 2                     | 10                   |
| 4 Certifications                                                                       | 4                    | 13              | 8           | 5                   | 0                   | 4                     | 0                     | 27                   |
| 5 Employment                                                                           | 1                    | 1               | 12          | 0                   | 0                   | 2                     | 6                     | 1                    |
| 6 Innovation                                                                           | 2                    | 2               | 9           | 1                   | 2                   | 3                     | 1                     | 4                    |
| 7 Protection                                                                           | 4                    | 2               | 9           | 1                   | 3                   | 0                     | 3                     | 3                    |
| 8 Commer                                                                               | 2                    | 0               | 1           | 4                   | 0                   | 3                     | 14                    | 4                    |
| 9 Knowledge tranf.                                                                     | 1                    | 2               | 1           | 2                   | 0                   | 0                     | 2                     | 1                    |
| <b>10 Fishing Tourism</b>                                                              | <b>2</b>             | <b>10</b>       | <b>19</b>   | <b>8</b>            | <b>22</b>           | <b>1</b>              | <b>13</b>             | <b>37</b>            |
| 11 Others                                                                              | 0                    | 3               | 8           | 6                   | 3                   | 11                    | 8                     | 4                    |
| Nº projects                                                                            | 22                   | 41              | 61          | 23                  | 30                  | 28                    | 50                    | 86                   |
| Nº projects linked to an action plan for sustainability of small-scale coastal fishing | 0                    | 3               | 12          | 4                   | 0                   | 3                     | 4                     | 10                   |
| Legeng                                                                                 |                      |                 |             |                     |                     |                       |                       |                      |
| 1. Use of by-products. (Discards)                                                      |                      |                 |             |                     |                     |                       |                       |                      |
| 2. Exploitation of the environmental heritage                                          |                      |                 |             |                     |                     |                       |                       |                      |
| 3. Promotion and awareness campaigns                                                   |                      |                 |             |                     |                     |                       |                       |                      |
| 4. Promotion of the certification and marketing of fishing and aquaculture products    |                      |                 |             |                     |                     |                       |                       |                      |
| 5. Training for the promotion of employment                                            |                      |                 |             |                     |                     |                       |                       |                      |

---

6. Promotion of innovation in presentations and derivatives

---

7. Protection and recovery of biodiversity and marine ecosystems

---

8. Reduction of marketing channels

---

9. Knowledge transfer between researchers and fishermen

---

10. Fishing tourism

---

11. Others

---

<sup>1</sup> Source: Spanish Network of Fisheries Groups (REGP), last accessed 01\_10\_20.

Table S2. EMFF Projects with line of action in Fishing Tourism. Galicia (2014–2020).

| FLAG                                                                                             | 1 Vigo – A Guarda | 2 Pontevedra | 3 Arousa | 4 Costa Sostible | 5 Costa da Morte | 6 Southern Artabro | 7 Northern Artabro | 8 Mariña-Ortegal | All FLAGS |
|--------------------------------------------------------------------------------------------------|-------------------|--------------|----------|------------------|------------------|--------------------|--------------------|------------------|-----------|
| Fishing Tourism projects                                                                         | 2                 | 10           | 19       | 8                | 22               | 1                  | 13                 | 37               | 112       |
| 1. Pesca-turismo                                                                                 | 0                 | 0            | 2        | 0                | 2                | 0                  | 0                  | 0                | 4         |
| 2. Accommodation                                                                                 | 1                 | 3            | 2        | 3                | 8                | 0                  | 4                  | 13               | 34        |
| 3. Restaurants                                                                                   | 1                 | 1            | 0        | 2                | 4                | 0                  | 1                  | 2                | 11        |
| 4. Water sports                                                                                  | 0                 | 0            | 6        | 1                | 3                | 0                  | 5                  | 5                | 20        |
| 5. Heritage                                                                                      | 0                 | 1            | 4        | 1                | 2                | 0                  | 2                  | 8                | 18        |
| 6. Products                                                                                      | 0                 | 2            | 1        | 1                | 1                | 1                  | 1                  | 1                | 8         |
| 7. Others                                                                                        | 0                 | 3            | 2        | 0                | 0                | 0                  | 0                  | 1                | 6         |
| 8. Several lines                                                                                 | 0                 | 0            | 2        | 0                | 2                | 0                  | 0                  | 7                | 11        |
| Total projects                                                                                   | 22                | 41           | 61       | 23               | 30               | 28                 | 50                 | 86               | 341       |
| <b>Legeng</b>                                                                                    |                   |              |          |                  |                  |                    |                    |                  |           |
| 1. Pesca-turismo                                                                                 |                   |              |          |                  |                  |                    |                    |                  |           |
| 2. Related to the accommodation offer                                                            |                   |              |          |                  |                  |                    |                    |                  |           |
| 3. Related to restaurant offerings                                                               |                   |              |          |                  |                  |                    |                    |                  |           |
| 4. Related to sport fishing or water sports                                                      |                   |              |          |                  |                  |                    |                    |                  |           |
| 5. Aimed at promoting maritime cultural heritage, seafood gastronomy, or environmental awareness |                   |              |          |                  |                  |                    |                    |                  |           |
| 6. Creation of tourist products                                                                  |                   |              |          |                  |                  |                    |                    |                  |           |
| 7. Others                                                                                        |                   |              |          |                  |                  |                    |                    |                  |           |
| 8. Projects that include several lines of action                                                 |                   |              |          |                  |                  |                    |                    |                  |           |

<sup>1</sup> Source: Spanish Network of Fisheries Groups (REGP), last accessed 01\_10\_20.

**Table S3.** Current laws and regulations that have introduced definitions and considerations on fishing or marine tourism and fishing tourism in Spain.

| <b>Law/Regulation</b>                           | <b>Level</b>     |
|-------------------------------------------------|------------------|
| Law 33/2014, on marine fishing                  | Spain            |
| Royal Decree 239/2019 on fishing tourism        |                  |
| Draft Decree on fishing tourism                 | Andalusia        |
| Law 6/2013, on fisheries                        | Balearic Islands |
| Decree 22/2016 on fisheries diversification     |                  |
| Draft Decree on fishing tourism                 | Basque Country   |
| Law 15/2019 on fisheries (amending Law 17/2003) | Canary Islands   |
| Law 2/2010 on fisheries                         | Catalonia        |
| Decree 87/2012 on fishing tourism               |                  |
| Law 1/2009 on fisheries (amending Law 11/2008)  | Galicia          |
| Decree 153/2019 on seafood and algae resources  |                  |
| Law 2/2007 on marine fishing and aquaculture    | Murcia           |
| Law 5/2017 on marine fishing and aquaculture    | Valencia         |
| Decree 56/2017 on fisheries diversification     |                  |

Source: Own work
